# Supplementary material
Source: PubMed Central journal article supplement (PMC9870036)
Supplement: NIHMS1864875-supplement-1.pdf [file NIHMS1864875-supplement-1.pdf]

1  
2  
3  
4  
5  
6  
7  
8  
9  
10  
11  
12  
13  
14  
15  
16  
17  
18  
19  
20  
21  
22  
23  
24  
25  
26  
27  
28  
29  
30

## Supplementary Materials for

GPNMB confers risk for Parkinson’s Disease through interaction with alpha-synuclein

Maria E. Diaz-Ortiz, Yunji Seo, et al.

Correspondence to: [chenplot@pennmedicine.upenn.edu](mailto:chenplot@pennmedicine.upenn.edu)

### **This PDF file includes:**

- Materials and Methods
- Figs. S1 to S7
- Tables S1, S4 to S11
- Captions for Tables S2 to S3, S12
- Caption for Data S1

### **Other Supplementary Materials for this manuscript include the following:**

- Tables S2 to S3, S12
- Data S1 [Cell profiler pipeline for image processing]

31 **Materials and Methods:**

32 RNA isolation and library preparation from human brain samples:

33 Human postmortem brain samples from neurologically normal controls (NC, n = 2) and  
34 PD (n = 4) individuals were obtained from the University of Pennsylvania Center for  
35 Neurodegenerative Disease Research (CNDR) Brain Bank and dissected as previously described  
36 (29). Demographics are summarized in **Table S1**. The regions analyzed included the caudate  
37 nucleus, cingulate gyrus, and cerebellum. Samples comprised predominantly gray matter.  
38 Genotypes for the brain samples were obtained as previously described (29, 30).

39 Total RNA was isolated from postmortem brain samples using the Qiagen RNeasy kit as  
40 previously described (29). After RNA isolation, RNA purity and integrity were assessed by  
41 spectrophotometric measurement of 260/280 nm OD ratios and by capillary electrophoresis on  
42 an Agilent 2100 Bioanalyzer.

43 Library preparation was performed with the KAPA RNA HyperPrep Kit (KR1350,  
44 Illumina Platforms, Roche, WI). Briefly, RNA was fragmented using heat and magnesium for 8  
45 minutes at 94°C to obtain 100-200bp fragments. The first cDNA strand was then synthesized  
46 using a thermocycler, followed by the second strand synthesis combined with A-tailing. Unique  
47 adapters were then ligated onto the library insert fragments and amplified using high-fidelity,  
48 low-bias PCR. The products then underwent a bead-based cleanup for purification of the cDNA  
49 libraries.

50 SeqCap RNA Choice™ probe pool design:

51 The SeqCap RNA probe design pool was designed by Roche Sequencing Solutions  
52 Custom Design (Roche, WI). The pool was designed to contain probes about 60bp in length with  
53 no more than 20 “close matches” in the genome, as determined by the Sequence Search and

54 Alignment by Hashing Algorithm (SSAHA), for the purposes of providing sufficient coverage of  
55 transcripts of interest while minimizing potential off-target effects. A “close match” was defined  
56 as any genomic sequence that differed from one of the probe sequences by five or fewer single-  
57 base insertions, deletions, or substitutions. The majority of included probes had no off-target  
58 matches, with an exceedingly small percentage of probes displaying very few off-target matches.  
59 Only exonic probes covering the transcripts of interest were included and, to minimize SNP-  
60 mediated capture bias, probes that overlapped any SNPs in linkage disequilibrium ( $r^2 > 0.2$ ) with  
61 the sentinel PD GWAS SNP were excluded.

62 Target cDNA enrichment and sequencing:

63 Target cDNA enrichment and sequencing was performed as previously described (14)  
64 using the SeqCap EZ Accessory kit v2 (07145594001, Roche, WI). Briefly, equimolar amounts  
65 of cDNA libraries were combined for a total mass of 1 $\mu$ g. Each of these libraries underwent  
66 multiplexed PCR with unique index oligonucleotides. The libraries were then hybridized with  
67 capture probes using the SeqCap EZ Hybridization and Wash Kit (05634261001, Roche, WI). In  
68 brief, libraries were dried with heat in a vacuum and resuspended with hybridization reagents.  
69 Pooled capture probes for each region were added to the resuspended libraries and incubated for  
70 20 hrs in a thermocycler at 47°C, with the lid temperature at 57°C. The captured multiplex  
71 cDNA samples then underwent stringent washing steps and were amplified using ligation-  
72 mediated PCR (LM-PCR). These post-capture PCR amplified libraries were pooled and  
73 sequenced on two lanes of an Illumina HiSeq 2500 with 150bp paired-end reads, yielding ~150  
74 million read pairs per lane.

75 Read mapping and allele specific expression analyses:

76 To assess RNA-seq reads quality we employed FastQC (31), while for reads quality  
77 filtering and trimming we used Trimmomatic (Version 032) (32). We ran Trimmomatic to  
78 remove low quality fragments in a 4 base wide sliding window (average window quality below  
79 PHRED 20), and low quality leading and trailing bases (below PHRED 10). We also dropped all  
80 the reads with average PHRED quality below 25, as well as reads shorter than 75 bases.  
81 Depending on the sample, 65–80% of reads passed this trimming and filtering step, resulting in  
82 6.5–24 million read pairs per sample for mapping.

83 To perform unbiased allele specific read mapping to the reference human genome (hg19)  
84 we applied WASP–STAR pipeline (**Figure S7**). First, we mapped reads with STAR (33)  
85 applying 2 step alignment and filtered them for mapping bias using WASP (34). Before  
86 proceeding with variant calling, we removed duplicate reads using rmdup\_pe.py script  
87 incorporated into WASP pipeline. To call and filter SNV we used GATK tools; HaplotypeCaller,  
88 SelectVariants and VariantFiltration. We obtained allele specific read counts by GATK –  
89 ASEReadCounter. In order to filter out intergenic variants, we functionally annotated SNVs  
90 using VariantAnnotation (35) and TxDb.Hsapiens.UCSC.hg19.knownGene (36) R packages. To  
91 test for allele specific expression (ASE) at the gene level, we first selected proxy SNP's that  
92 were highly linked ( $r^2 > 0.6$ ) with rs199347 and located within a coding region for the gene of  
93 interest in order to assign allele of origin. For *GPNMB*, we assigned the allele of origin for each  
94 transcript read based on genotype at rs199355, and for *KLHL7*, we assigned the allele of origin  
95 based on genotype at rs2072368. We then tested for allelic imbalance with a beta-binomial  
96 model with overdispersion using the MBASED R package (13). P-values were adjusted for false  
97 discovery rate using the Benjamini-Hochberg method (37).

98 Colocalization analysis:

99 Colocalization analysis was performed as previously described (11) using the ‘coloc’  
100 package in R (version 4.0-2). Summary statistics from the latest PD GWAS (2) excluding the  
101 23andMe cohort were downloaded from the article’s supplementary information. The data  
102 includes 17.5M SNPs for 33.6K cases and 44.9K controls. All SNPs within 1Mb up or  
103 downstream of the top GWAS SNP (rs199351) were included in the analysis. Full summary  
104 eQTL data for whole blood, caudate nucleus, and substantia nigra were downloaded from the  
105 GTEx portal (Version 7) (10). GTEx contains paired-end RNA-seq (Illumina TruSeq) and whole  
106 genome sequencing data from normal individuals. The prior probabilities of p1, p2, and p12  
107 were set to 1e-4, 1e-4, and 1e-5 respectively. Significant colocalization was determined as  
108 having a PPH4 > 75%. Sensitivity analysis was performed to determine whether PPH4 is robust  
109 over plausible values of p12 (1e-5 to 1e-6) (38). Association plots were generated using  
110 LocusComparer package (version 1.0.0) (39) in R.

#### 111 Immortalized cell line transfection and collection:

112 For co-immunoprecipitation (co-IP) experiments, HEK293 or HeLa cells were plated at  
113 700,000 or 1 million cells per well, respectively, and 18 hours after plating, transfection was  
114 performed with 4ug of each DNA construct and Lipofectamine 2000 (Thermo Scientific) in  
115 serum-free DMEM. Cells were transfected with either GPNMB-myc-DDK pCMV6-Entry  
116 (Origene) and 5’ UTR-Syn pcDNA3.1+ (obtained from Dr. Kelvin Luk) for the GPNMB-flag IP  
117 or GPNMB untagged clone pCMV6-XL4 (Origene) and Syn-Myc pcDNA3.1+ (obtained from  
118 Dr. Kelvin Luk) for the Syn-Myc IP. 4 hours post-transfection, media was changed to DMEM  
119 with 10% FBS 1% L-Glut and 1% Pen-Strep. 20 hours post-transfection, cells were washed in  
120 dPBS and lysed in CHAPS buffer (25mM Tris, 150mM NaCl, 1mM EDTA 1% CHAPS, 5%

121 glycerol, pH to 7.4). Lysates were collected and spun down at 4°C for 30 minutes at 21380 xg.  
122 BCA assays (Thermo Scientific) were used to determine protein concentrations.

123 For immunofluorescence experiments, HEK293 or HeLa cells were plated at either  
124 100,000 or 200,000 cells per well on either PDL-coated or untreated 12mm glass coverslips in a  
125 12-well format. 18 hours after plating, the cells were transfected with 1.6µg of each DNA  
126 construct (GPNMB untagged clone pCMV6-XL4 and 5' UTR-Syn pcDNA3.1+) and  
127 Lipofectamine 2000 (Thermo Scientific) in serum-free DMEM. Cells were fixed, stained, and  
128 imaged 20 hours post-transfection as described in the immunofluorescence section.

#### 129 Co-immunoprecipitation:

130 To immunoprecipitate (IP) GPNMB, 300 µL anti-Flag-conjugated beads (Sigma A2220)  
131 or mouse IgG-conjugated beads (Sigma A0919, used as a negative control) were used to IP from  
132 1,000 µg of lysate from GPNMB-myc-DKK and 5'UTR-syn double-transfected cells in CHAPS  
133 buffer overnight at 4°C. To IP α-synuclein, 300 µL anti-c-Myc-conjugated beads (Sigma A7470)  
134 or rabbit IgG-conjugated beads (Sigma A2909, used as a negative control) were used to IP from  
135 1,000 µg of lysate from GPNMB untagged clone and Syn-Myc double-transfected cells in  
136 CHAPS buffer overnight at 4°C. After 24 hours, the protein-conjugated beads were washed 3x  
137 with CHAPS buffer and the bound protein was competitively eluted from the beads using either  
138 250 µM 3x flag peptide (Sigma) or 250 mM myc peptide (Sigma) for 1 hour at 4°C. The input,  
139 eluates, and flow-throughs were run on a mini-protean 4-20% polyacrylamide gradient gel at an  
140 input:IP:flow-through ratio of 1:10:1 or 1:100:1 ratio, as indicated in the text.

#### 141 CRISPR-Cas9 knock-out of human iPSC's:

142 Human induced pluripotent stem cells (iPSC) with *Neurog1* and *Neurog2* in a bicistronic  
143 doxycycline-inducible expression cassette (22) were used for generation of GPNMB knock-out

144 (KO) iPSC and rapid induction of iPSC-derived neurons (iPSC-N). The protocol for generating  
145 CRISPR edited iPSC's is summarized in **Figure S3**. iPSCs were dissociated with Accutase  
146 (Innovative Cell Technologies), spun down at 200xg for 4 minutes, and plated at 240k cells/well  
147 on Matrigel (CORNING)-coated 12-well plates in mTeSR1 media (STEMCELL Technologies)  
148 with 2uM Thiazovivin (Cayman Chemical). The next day, GPNMB sgRNA (Synthego) and  
149 TrueCut Cas9 (Invitrogen) were mixed at a 0.75:1 molar ratio in OptiMEM. An equal volume of  
150 OptiMEM + 1:10 Lipofectamine STEM reagent (Thermo Fisher) was added to the sgRNA/Cas9  
151 mixture and allowed to incubate at room temperature for 15 minutes. The media was replaced  
152 with serum-free OptiMEM + 2uM thiazovivin and transfected with the  
153 sgRNA/Cas9/Lipofectamine mixture for 3-4 hours, after which, an equal amount of mTeSR1  
154 was added. 18h after transfection, the media was replaced with 100% mTeSR1 and 48h later, the  
155 cells were dissociated with Accutase and plated as single cells in a low-density manner (2,000-  
156 4,000 cells per 10cm plate).

157 Colonies resulting from individual clones were isolated; a small fraction of the colony  
158 was processed for genomic DNA using QuickExtract™ DNA extraction solution (Lucigen) and  
159 the rest was plated for expansion. QuickExtract DNA from individual clones was screened for  
160 indels using T7 Endonuclease 1 (T7E1) assay. Briefly, a region spanning the cut site in an  
161 asymmetric manner was amplified by PCR using the following primers:

162 Fwd: 5'-TACGTGTCGCTTGGAATCTTGA-3'

163 Rev: 5'-ATATTGCCAAGTCCAGGTGC-3'

164 The PCR product was incubated with T7E1 for 30 minutes at 37°C, after which the reaction was  
165 stopped with EDTA. The reaction product was run on a 1.5% agarose gel and clones with 2  
166 bands of different sizes (rather than a single band of larger size) were prioritized for further

167 validation. PCR products were purified and Sanger sequenced. The sequencing results were  
168 analyzed with Synthego's ICE tool (<https://ice.synthego.com/#/>), which allowed us to identify 5  
169 clones of interest (showing two bands on T7E1 assay and predicted indels on one or both DNA  
170 strands) that, along with a wild-type (WT) clone, were expanded and validated by TOPO  
171 cloning.

172 Briefly, high quality genomic DNA was isolated using QIAamp DNA mini kit  
173 (QIAGEN) and the region of interest was PCR amplified with the primers listed above. PCR  
174 products were purified and incubated with pCR<sup>TM</sup>4-TOPO<sup>®</sup> vector (Invitrogen) for 5 minutes at  
175 RT. One Shot<sup>®</sup> chemically competent *E. coli* were transformed with the TOPO reaction  
176 products, streaked on LB + Kanamycin selective plates, and incubated at 37°C overnight. The  
177 next morning, 30 colonies per clone were picked and miniprepped, and the resulting DNA was  
178 sent for sanger sequencing. Sequences were aligned using Benchling's alignment tool and  
179 protein sequences were predicted using the Expasy protein translator tool  
180 (<https://web.expasy.org/translate/>). Cells populations were determined to be clonal if only 2  
181 alleles were present at a ~50:50 ratio (tested by binomial likelihood ratio test).

182 GPNMB KO in iPSC's was validated by qPCR using either the SYBR-green or TaqMan  
183 master mixes and the following primers:

184 *GPNMB* (fwd): 5'- CTTCTGCTTACATGAGGGAGC-3'

185 *GPNMB* (rev): 5'- CTCCTTCCAGGAGTTTTTCC-3'

186 *ACTB*: 4352935E, Applied Biosystems

187 qPCR data was analyzed using the  $\Delta\Delta C_t$  method.

188 Culture and differentiation of iPSC-Neurons:



189 Prior to differentiation, iPSC cultures were maintained on Matrigel-coated 6cm tissue  
190 culture plates with mTeSR1 media and mechanically passaged every 4 days with StemMACS  
191 passaging solution XF. The neural induction protocol is described in detail in **Figure S4 (40)**. To  
192 initiate neuronal induction, iPSCs were dissociated with Accutase, spun down at 200xg for 4  
193 minutes, and plated at 700k cells/well on Matrigel-coated 6-well plates in N2 pre-differentiation  
194 media (KnockOut DMEM/F12 (Gibco) with 1x N-2 supplement (Gibco), 1x MEM Non-essential  
195 Amino Acid (MEM NEAA) solution (Gibco), 10ng/ml BDNF (Gibco), 10ng/ml NT-3 (Gibco,  
196 Preprotech), 0.2ug/ml Laminin (Gibco), and 2ug/ml doxycycline hyclate (Sigma) ) with 10ug/ml  
197 Y-27632 (Tocris). Full media changes were performed at 24 and 48hrs with and without Y-  
198 27632 respectively. 12mm round glass coverslips were placed in a 12-well plate, and coverslips  
199 or 6-well plates were coated with 10ug/mL poly-D-lysine (PDL, Sigma) in borate buffer (pH =  
200 8.4) for 1hr at room temperature. The PDL-coated coverslips or plates were then rinsed three  
201 times with tissue culture grade water (Lonza) and coated with 1:100 Matrigel in DMEM/F12  
202 (Gibco) for 1hr at room temperature prior to being stored at 37°C overnight. On day 3, the cells  
203 were re-plated at 200,000 cells/well on PDL/Matrigel coated coverslips (for  
204 immunofluorescence) or at 1 million cells/well in PDL/Matrigel coated 6-well plates (for  
205 immunoblotting or RNA isolation). Pre-differentiated iPSC-N were dissociated with Accutase,  
206 spun down at 200xg for 4 minutes, and resuspended in classic neuronal media (50%  
207 DMEM/F12, 50% Neurobasal-A media (Gibco), 1x MEM NEAA, 0.5x N-2 supplement, 0.5x  
208 GlutaMAX supplement (Gibco), 0.5x B27 supplement (Gibco), 10ng/ml BDNF, 10ng/ml NT-3,  
209 1ug/ml Laminin, and 2ug/ml doxycycline) for plating. Half media changes were performed every  
210 7 days with neuronal media without doxycycline.

211 Immunofluorescence:

212 The media was aspirated from coverslip-containing wells, and the cells were fixed in 2%  
213 paraformaldehyde in dPBS for 15 minutes at room temperature. After fixing, the coverslips were  
214 rinsed 5x with dPBS and blocked/permeabilized with blocking buffer (3% bovine serum albumin  
215 + 0.05% saponin in dPBS) for 1hr prior to incubating in primary antibody overnight. The  
216 coverslips were then rinsed 4x with blocking buffer and incubated with secondary antibody for  
217 1hr at room temperature. Finally, the coverslips were rinsed 4x with blocking buffer and either  
218 incubated in DRAQ5 for 30 minutes or mounted onto microscope slides without DRAQ5 using a  
219 small amount of ProLong Gold (ThermoFisher). Slides were sealed with clear nail polish and  
220 stored at 4C. Image stacks of 1um thickness were acquired by confocal microscopy (Leica SP5)  
221 using a 40x oil immersion objective with 2x Zoom. Antibody concentrations are summarized in  
222 the Key Resources Table.

#### 223 Image processing and quantification:

224 Image processing to quantify synaptic proteins was performed using a Cell Profiler  
225 pipeline based on Danielson et. al.'s previously published work (41). A single slice was chosen  
226 from each stack to focus our analysis on the plane with the most abundant synapsin-1 staining.  
227 TUBB3 images underwent image enhancement for neurite-like features and were used to  
228 calculate TUBB3+ area for normalization and expanded to generate a mask. Synapsin-1 and  $\alpha$ -  
229 synuclein images underwent enhancement for speckle-like features, followed by object  
230 identification and characterization of object size/intensity. The total integrated intensity (i.e. sum  
231 for all particles) was used for analysis. The pipeline used has been made publicly available as  
232 supplementary material.

233 aSyn pathology in iPSC-N was also quantified using CellProfiler. Maximum intensity  
234 projections of z-stack images were created using FIJI. Desired 81a+ objects were identified with

235 intensity thresholding and the total area of 81a+ objects were normalized with total area of  
236 DRAQ5+ objects. To quantify MJFR1+ staining in HEK293 overexpressing GPNMB, nuclei  
237 artifact staining was removed by generating DRAQ5+ nuclei mask and excluding MJFR1+  
238 speckles within the mask. Total area of MJFR1+ objects was normalized by total area of  
239 DRAQ5+ objects.

240 A researcher blinded to sample identity was provided with randomly ordered maximum  
241 intensity projection of z-stack images of iPSC-N treated with AF594-PFF. Scores ranging from 0  
242 to 3 were given for each criterion: intensity, length and frequency of internalized PFF. The three  
243 scores were added, and were normalized to the average score of WT iPSC-N for each individual  
244 experiments.

#### 245 Synaptosome extraction:

246 Synaptosomes were extracted using Syn-PER™ Synaptic Protein Extraction Reagent  
247 (Thermo-Fisher) per the user instructions. Briefly, 14-day and 21-day iPSC-N's cultured in 6-  
248 well plates were rinsed twice with ice cold PBS, then scraped into 200ul SYN-PER reagent plus  
249 protease inhibitors (25mg Pepstatin in 3mL EtOH, 25mg Leupeptin, 25mg TPCK, 25mg TLCK,  
250 25mg Trypsin Inhibitor from soybean, 5mL of 0.5M EDTA and add H<sub>2</sub>O to a final volume of  
251 25mL, to use at 1:1000) and phenylmethylsulfonyl fluoride (VWR) per well. The samples were  
252 spun down for 10 minutes at 1200 xg and 4°C and the supernatant was transferred to a new tube.  
253 The supernatant was then spun down for 20 minutes at 15,000 xg and 4°C, after which the  
254 supernatant (cytosolic fraction) was transferred to a new tube and the residual pellet  
255 (synaptosomal fraction) was resuspended in 20ul of Syn-PER reagent per well.

#### 256 Immunoblotting:

257 Samples were diluted in 5X concentrated sample buffer (10g Sucrose, 1.85mL 0.5M Tris,  
258 pH 6.8, 1.0mL 0.1M EDTA, 1.0mL of 0.1% Bromophenol Blue, 1.0mL of 0.05% Pyronine  
259 Yellow, 0.615g of DTT, 10mL of 10% SDS, and adjusted to a final volume of 20mL with Milli-  
260 Q Water) and boiled at either 100°C for 10 minutes or 70°C for 15 minutes for heat-sensitive  
261 proteins (GPNMB). Samples were run on 4-20% polyacrylamide TGX gels (Bio-Rad  
262 Laboratories) and transferred onto 0.2 nitrocellulose membrane (Bio-Rad Laboratories). When  
263 blotting for  $\alpha$ -synuclein, membranes were fixed in 0.4% PFA for 30 minutes (42). Membranes  
264 were blocked in 5% milk in TBS for 1 hour and blotted overnight at 4°C with specific antibodies.  
265 The membranes were incubated for 2 hours in HRP-conjugated secondary antibodies and  
266 developed using Western Bright ECL and Sirius HRP substrates (Advansta). Antibody  
267 concentrations are summarized in the Key Resources Table. Densitometry was performed using  
268 the Bio-Rad Image Lab Software.

#### 269 RNA sequencing of iPSC-N:

270 RNA was extracted from iPSC-N on days 0 and 14 after doxycycline induction using  
271 QIAGEN RNAeasy ® mini kit. RNA integrity was measured using RNA nano chips (Agilent)  
272 on an Agilent 2100 Bioanalyzer. All samples had RIN > 9.4. Library preparation was performed  
273 by the Penn Next Generation Sequencing (NGS) Core staff with the TruSeq Stranded mRNA  
274 Library Prep kit (Illumina cat #20020595) using 225ng total RNA and following manufacturer  
275 instructions. High sensitivity DNA chips (Agilent) were used to balance libraries prior to  
276 sequencing. In total 30 RNA samples (3 genotypes (WT, Het and KO) x 2 differentiation time  
277 (days 0 and 14) x 5 biological replicates) were sequenced. All 30 samples were sequenced  
278 together on a single S2 flow-cell generating  $>1.1 \times 10^9$  of 100 bp single end reads in total (on

279 average  $3.69 \times 10^7$  reads per sample, ranging from  $2.9 \times 10^7$  to  $5.3 \times 10^7$ ). A summary of the  
280 Illumina NovaSeq run is provided in **Table S12**.

281 Read quality control and filtering:

282 A quality check of the raw reads was assessed using FastQC (31) and summarized with  
283 MultiQC (43). Next, the adapters were removed and filtering of the low quality reads was  
284 conducted employing Trimmomatic, Version 0.39 (32) with the following parameters:  
285 *ILLUMINACLIP:TruSeq3-SE.fa:2:30:10 LEADING:5 TRAILING:5 SLIDINGWINDOW:5:20*  
286 *MINLEN:50 AVGQUAL:30 HEADCROP:10*. The adapters that matched the sequences provided  
287 by TruSeq3-SE.fa were removed. The low-quality bases were cut off the start and off the end of  
288 reads if their PHRED score was below 5. The sliding window of 5 bp was applied to trim the  
289 bases if the window PHRED score dropped below 20. The 10 bases from the start of the reads  
290 were also cropped. Finally, the reads were discarded if the average PHRED score of the read was  
291 below 30.

292 Read alignment and quantification:

293 The sequence alignment BAM files generated by Bowtie 2 were used as the input to  
294 RSEM software tool, in order to quantify gene expression levels (44). On average,  $3.61 \times 10^7$   
295 (97.8%) of reads per sample passed the filtering steps and were mapped versus reference genome  
296 GRCh38 using Bowtie 2 with the following parameters: *bowtie2 -q --phred33 --sensitive --*  
297 *dpad 0 --gbar 99999999 --mp 1,1 --np 1 --score-min L,0,-0.1 --nofw -p 32 -k 200 -x*, as suggested  
298 by RSEM manual. The read alignment rate was on average >89% (**Table S13**). To obtain the raw  
299 read counts at the gene level, an expectation maximization algorithm (RNA-seq by Expectation  
300 Maximization) was run by the following RSEM command: *rsem-calculate-expression --*  
301 *bowtie2 --forwardprob 0*.

302 Differential gene expression analysis:

303 To detect significant differences in iPSC-N gene expression data between Day 0 and Day  
304 14 and between the genotypes (WT, Het, and KO), DESeq function from DESeq2  
305 Bioconductor's R package (45) was used. RNA-seq data was modeled using the negative  
306 binomial distribution that accounts for overdispersion. In particular, DESeq function calculates  
307 the library size factors for each sample using the *median of ratios method*. Then, the gene-wise  
308 dispersion was assessed using the parametric argument of the *estimateDispersions* function,  
309 which estimates the dispersions using the negative binomial distribution. To conduct the pairwise  
310 comparisons (Day 14 vs. Day 0 in WT, KO vs. WT, Het vs. WT, and KO vs Het at Day 14) for  
311 each gene the *nbinomWaldTest* statistic was used. The Wald test P-values were calculated by  
312 scaling the coefficients by their standard errors and then compared to a standard Normal  
313 distribution. After DGE analysis, the *lfcShrink* function from R package *apeglm* (46) was  
314 applied to shrink the log2FC. We corrected for FDR using the Benjamini & Hochberg method  
315 (37). Genes with a BH corrected P-value  $< 0.01$  and a  $|\log_2 \text{fold-change}| > 1$  were considered to  
316 be significantly differentially expressed. To visualize the results of DGE analyses we used  
317 EnhanceVolcano R package version 1.10.0 (47).

318 Modular co-expression network analysis:

319 Modular co-expression network analysis of iPSC-Ns was performed using R package  
320 *CEMiTool* (Co-Expression Molecules identification Tool) version 1.14.1 (48). The *rlog*  
321 normalized expression data (15981 genes in 15 samples) was used as an input to *cemitool*  
322 function. As a first step, *cemitool* conducted an unsupervised filtering of expression data using  
323 the inverse gamma distribution to model the variance of genes. Out of 15981 genes, 1100 genes  
324 with the P-value  $< 0.1$  survived this filtering were used for downstream analyses. The genes were

325 then separated into modules using the dissimilarities measures and the *Dynamic Tree Cut*  
326 package (49). The minimum number of genes per module was set to 20, and similar modules  
327 were merged together based on correlation.

328 To determine biological functions associated with the co-expression modules, the Gene  
329 Ontology gene sets *c5.all.v7.4*, which contain GO resources (BP = biological process, CC =  
330 cellular component and MF = molecular function) and human phenotype ontology (HPO) from  
331 MSigDB database (50), were used in overrepresentation analysis (ORA). The module gene set  
332 enrichment analysis (GSEA) was performed using the *fgsea* R package (51) within the CEMiTool  
333 pipeline. First, a z-score gene normalization on all input genes was performed following by  
334 calculation of the mean for each sample class (GPNMB WT, Het, and KO). Next, a pre-ranked  
335 GSEA was performed independently for each GPNMB genotype. The module activity was  
336 visualized by normalized enrichment score (NES), which represents enrichment score (ES) for a  
337 module in each iPSC-N GPNMB genotype normalized by the number of genes in the module.  
338 To construct the gene interactions network in the co-expression modules, the combined human  
339 protein-protein interaction data, downloaded from GeneMANIA (24), were added to the  
340 CEMiTool object using the function *interactions\_data*. The interactions between the genes were  
341 visualized using the *plot\_interactions* function.

#### 342 aSyn pre-formed fibril internalization and immunofluorescence experiments:

343 Human wild-type pre-formed fibrils (PFF) and fluorescent fibrils including Alexa Fluor  
344 594 (AF594) conjugated aSyn were provided by Dr. Kelvin Luk at the Penn CNDR. All fibrils  
345 were kept at -80°C until use. After the stock of 5mg/mL was diluted to a working concentration  
346 of 0.1mg/mL in dPBS, fibrils were sonicated (Diagenode Biorupter® Plus) on high, sonicating  
347 for 30 sec followed by 30 sec rest for total of 10 minutes. Sonicated PFFs were then added to

348 classic neuronal media according to appropriate concentrations. Each PFF transduction  
349 experiment was repeated and quantified at least three times from independently differentiated  
350 neurons.

351 For AF594-PFF internalization experiments using iPSC-N, 10ug of PFF were added per  
352 well of a 12-well plate. iPSC-N were incubated in 4°C for 30 min, followed by an additional 30  
353 min incubation at 4°C for the negative control (to inhibit endocytosis) or 1 hour 30 min in 37°C  
354 for experimental wells. All cells were immediately fixed and stained afterwards.

355 To demonstrate aSyn pathology following PFF transduction, we replaced regular media  
356 of iPSC-N at day 14 with classical neuronal media containing total of 1ug of human wild-type  
357 PFF per well. iPSC-N were fixed and stained after 14 days (at day 28 of neuronal induction). To  
358 extract soluble proteins, coverslips were fixed with 2% paraformaldehyde and 1% Triton X-100  
359 in dPBS. 3% bovine serum albumin without saponin in dPBS was used as blocking buffer.

360 For wild-type PFF internalization experiments using HEK293, cells were plated at  
361 200,000 cells per well in PDL-coated 12mm glass coverslips in a 12-well format. 18 hours after  
362 plating, the cells were transfected with 1ug of DNA (GPNMB untagged clone pCMV6-XL4 or  
363 TMEM106B-Flag) and Lipofectamine 2000 (Thermo Scientific) in serum-free DMEM. At 20  
364 hours post-transfection, media was replaced with DMEM containing 1ug of PFF per well. The  
365 plates were incubated for 30 min at 4°C followed by an additional 30 min incubation at 4°C for  
366 negative control (to inhibit endocytosis) or 1 hr 30 min in 37°C for experimental wells. All cells  
367 were immediately fixed and stained for immunofluorescence afterwards.

#### 368 Patient samples and genotypes:

369 Plasma and CSF samples of PD patients and neurologically normal controls were  
370 obtained as part of the Penn CNDR Neuropathology, Biomarker, and Genetics Biobank and the



371 Parkinson's Disease Molecular Integration in Neurological Diagnosis Initiative (MIND) studies.  
372 PD patients had a clinical diagnosis of PD made by a movement disorders specialist at the  
373 Parkinson's Disease and Movement Disorder Clinic (PDMDC) at the University of  
374 Pennsylvania, while controls had no known neurological disorder. Data were stored in the Penn  
375 Integrated Neurodegenerative Disease Database (INDD) (30). These studies were approved by  
376 the UPenn Institutional Review Board (IORG0000029). Informed consent was obtained at study  
377 enrollment. Participant demographics are reported in **Tables S4 – S7**. Individuals with known  
378 *GBA1* mutations (N370S, E365K, L444P) were excluded from the analysis, since GPNMB  
379 elevation has been reported in patients with Gaucher disease, a lysosomal storage disorder  
380 caused by homozygous mutations in *GBA1* (52, 53). Genotyping of SNP rs199347 was  
381 performed by Infinium Global Screening Assay (Illumina), NeuroX genotyping platform (30),  
382 PANDoRA (Sequenom) panel (30), or MIND panel based on allele-specific PCR performed  
383 using FlexSix Dynamic Array integrated fluidic circuits (Fluidigm) and genotyping using  
384 BioMark HD system (Fluidigm) (54).

385 A subset of PD individuals had measures of disease severity as assessed by the motor  
386 subscale of the Unified Parkinson's Disease Rating Scale (UPDRS- III) (25). These individuals  
387 are part of the University of Pennsylvania U19 Cohort (formerly Udall Cohort), which has been  
388 previously described (55).

389 Enzyme-Linked Immunosorbent Assay (ELISA):

390 GPNMB protein levels within human plasma and CSF samples were measured with  
391 ELISA kits (R&D systems) according to manufacturer's instructions. CSF and plasma samples  
392 were diluted by factors of 1 in 2 and 1 in 30 respectively to obtain optical density measurements  
393 within the standard range. All samples were run in duplicates and absorbance at 450nm was

394 determined by a microplate reader (Berthold Technologies, Tristar LB 941). Only duplicate  
395 samples with a coefficient of variation (CV) <25% were retained for analysis, and the average  
396 CV across all samples used was 3.3%. Moreover, replicate samples assayed by ELISA on  
397 different days, by different operators, across multiple freeze-thaw cycles, demonstrated excellent  
398 reproducibility (Pearson  $r=0.97$ ).

399 The  $\log_{10}$ GPNMB concentration (pg/mL) for each sample was interpolated from a  
400 sigmoidal (4 parameters logistic) standard curve using GraphPad Prism 9.

#### 401 Multiple Linear Regression Analyses:

402 Multiple linear regression was used to determine factors that are significant predictors of  
403 GPNMB concentration in plasma and CSF. Age, sex, PD status, and rs199347 genotype were  
404 included as independent variables. A codominant genetic model, which considers each allele  
405 combination (GG, AG, AA) as a separate factor (56), was used to model the effect of rs199347.  
406 Regression coefficients were calculated with GG as the reference.

407 The relationship between GPNMB levels and disease severity was established in two  
408 different PD cohorts. GPNMB values for the discovery cohort were generated by ELISA (R&D  
409 systems), whereas GPNMB values for the replication cohort were generated using an aptamer-  
410 based platform (26). UPDRS-PIII values were downloaded from the Penn INDD.

#### 411 Statistical analyses:

412 Statistical analyses were performed with either PRISM or R. Data was tested for  
413 normality with a Shapiro-Walk test. Data with more than two categorical groups was analyzed  
414 by either 1-way ANOVA (followed by post-hoc Tukey or Dunnett tests) or Kruskal-Wallis test  
415 (followed by post-hoc Dunn's test) depending on the data's distribution. Data with only two  
416 groups was analyzed by either a Welch's two-sample t-test or Mann-Whitney-U test depending

417 on the data distribution. Correlations were determined using Spearman's rank correlation.  
418 Multiple linear regression (glm) was used to determine associations between two variables  
419 adjusting for potentially confounding covariates. Outlier determination was performed using  
420 ROUT method, Q (FDR)=1%.

#### 421 Immunohistochemistry

422         Formalin-fixed, paraffin-embedded cingulate and temporal cortex samples were obtained  
423 from the Penn CNDR. Patient demographics are reported in **Table S1**. 6µm sections were  
424 cleared in xylenes and a descending EtOH series. Endogenous peroxidases were quenched in  
425 30% H<sub>2</sub>O<sub>2</sub> and 70% MeOH solution for 30 minutes. Slides were microwaved in citric acid  
426 Antigen Unmasking Solution (Vector Laboratories). After cooling, slides were rinsed in TBS-T  
427 (0.1 M Tris Buffer/0.05% TWEEN) and blocked (TBS-T/2%FBS/3%BSA). Sections were  
428 incubated overnight at 4°C in the primary antibody (see Key Resources table for antibody  
429 conditions). Once washed with TBS-T, sections were incubated for 1 hour at room temperature  
430 in the secondary antibody (see Key Resources table for antibody conditions). VECTASTAIN  
431 ABC Standard (Vector Laboratories) was applied for 1 hour at room temperature followed by  
432 ImmPACT DAB (Vector Laboratories). Sections were counterstained with Harris Hematoxylin  
433 (Thermo Scientific) for 40 seconds. Slides were dehydrated in an ascending EtOH series and  
434 xylenes then coverslipped with Cytoseal (Thermo Scientific).

#### 435 Dephosphorylation and deglycosylation

436 For deglycosylation of cell and brain lysates, 5.0uL of PNGase F was added to 125ug of brain  
437 lysates or 60ug of cell lysates and incubated at 37°C for 30 minutes. For dephosphorylation  
438 experiments, 1uL of Lambda protein phosphatase was added to 125ug of brain lysates or 50ug of  
439 cell lysates and incubated at 30°C for 30 minutes.

440 Key Resources Tables:  
 441

| <b>Antibodies</b>                                       |                                                                                                |                                       |
|---------------------------------------------------------|------------------------------------------------------------------------------------------------|---------------------------------------|
| <b>Name</b>                                             | <b>Product ID</b>                                                                              | <b>Dilution</b>                       |
| Anti-Alpha-synuclein antibody (MJFR1)                   | Abcam (ab138501)                                                                               | IF: 1:300 – 1:1000*<br>WB: 1:1000     |
| Anti-Synapsin-1                                         | SySy (106-011)                                                                                 | IF: 1:500<br>WB: 1:1000               |
| Anti- $\alpha$ -synuclein Antibody (syn211)             | Santa Cruz (sc-12767)                                                                          | WB: 1:200                             |
| Anti- $\alpha$ -synuclein (phospho S129) Antibody (81a) | Provided by Center for Neurodegenerative Disease Research (CNDR) at University of Pennsylvania | IF: 1:5000                            |
| Anti-Human Osteoactivin/<br>GPNMB Antibody              | RnD Systems (AF2550)                                                                           | IF: 1:500<br>IHC: 1:200<br>WB: 1:1000 |
| Anti-GPNMB (E1Y7J) Rabbit mAb                           | Cell Signaling Technology (#13251)                                                             | WB: 1:1000                            |
| Anti-GPNMB Antibody (D-9)                               | Santa Cruz (sc-271415)                                                                         | IF: 1:500<br>WB: 1:250                |
| Anti-beta Actin antibody (AC-15)                        | Abcam (ab6276)                                                                                 | WB: 1:5000                            |
| Anti-beta-III Tubulin Antibody                          | Novus Biologicals (NB100-1612)                                                                 | IF: 1:500                             |
| Anti-Flag M2 Mouse Monoclonal Antibody                  | Sigma Aldrich (F1804)                                                                          | IF: 1:1000                            |
| Anti-GAPDH Antibody                                     | Advanced Immunochemical Anti-GAPDH                                                             | WB: 1:3000                            |
| Anti-LAMP1 Antibody (H4A3)                              | University of Iowa Hybridoma Bank                                                              | IF: 1 $\mu$ g/mL                      |
| Goat Anti-Chicken Alexa Fluor 647                       | Invitrogen (A-32933)                                                                           | IF: 1:1000                            |
| Goat Anti-Rabbit Alexa Fluor 488                        | Invitrogen (A-21206)                                                                           | IF: 1:1000                            |
| Donkey Anti-Mouse Alexa Fluor 594                       | Invitrogen (A-21203)                                                                           | IF: 1:1000                            |
| DRAQ5                                                   | Thermo-Fischer (62251)                                                                         | IF: 1:5000                            |
| Goat Anti-Mouse HRP                                     | Jackson Immuno Research (115-035-062)                                                          | WB: 1:3000                            |

|                               |                                          |             |
|-------------------------------|------------------------------------------|-------------|
| Goat Anti-Rabbit HRP          | Jackson Immuno Research<br>(111-035-144) | WB: 1:3000  |
| Biotinylated Rabbit Anti-Goat | Vector Laboratories (BA-5000-1.5)        | IHC: 1:5000 |

442 IF: Immunofluorescence, WB: Western blot, IHC: Immunohistochemistry

443

| <b>Cell Lines</b>                              |                                            |                                                           |                             |
|------------------------------------------------|--------------------------------------------|-----------------------------------------------------------|-----------------------------|
| Name                                           | Species                                    | Obtained from                                             | Citations                   |
| HeLa                                           | Homo sapiens                               | Michael S. Marks                                          |                             |
| QBI293                                         | Homo sapiens                               | Penn Center for Neurodegenerative Disease Research (CNDR) |                             |
| iPSC-N                                         | Homo sapiens                               | George Church                                             | (22)                        |
| <b>Deglycosylation and dephosphorylation</b>   |                                            |                                                           |                             |
| Name                                           | Product ID                                 |                                                           | Protocol                    |
| PNGase F (Deglycosylation)                     | New England Biolabs Inc., Catalog # P0704L |                                                           | As per product instructions |
| Lambda Protein Phosphatase (Dephosphorylation) | New England Biolabs Inc., Catalog # P0753S |                                                           | As per product instructions |

444

445 \*MJFR1 was used at 1:300 to stain endogenous  $\alpha$ -synuclein in iPSC-N and 1:1000 to stain  
446 overexpressed  $\alpha$ -synuclein in HEK293 and HeLa cells.

447

448

449

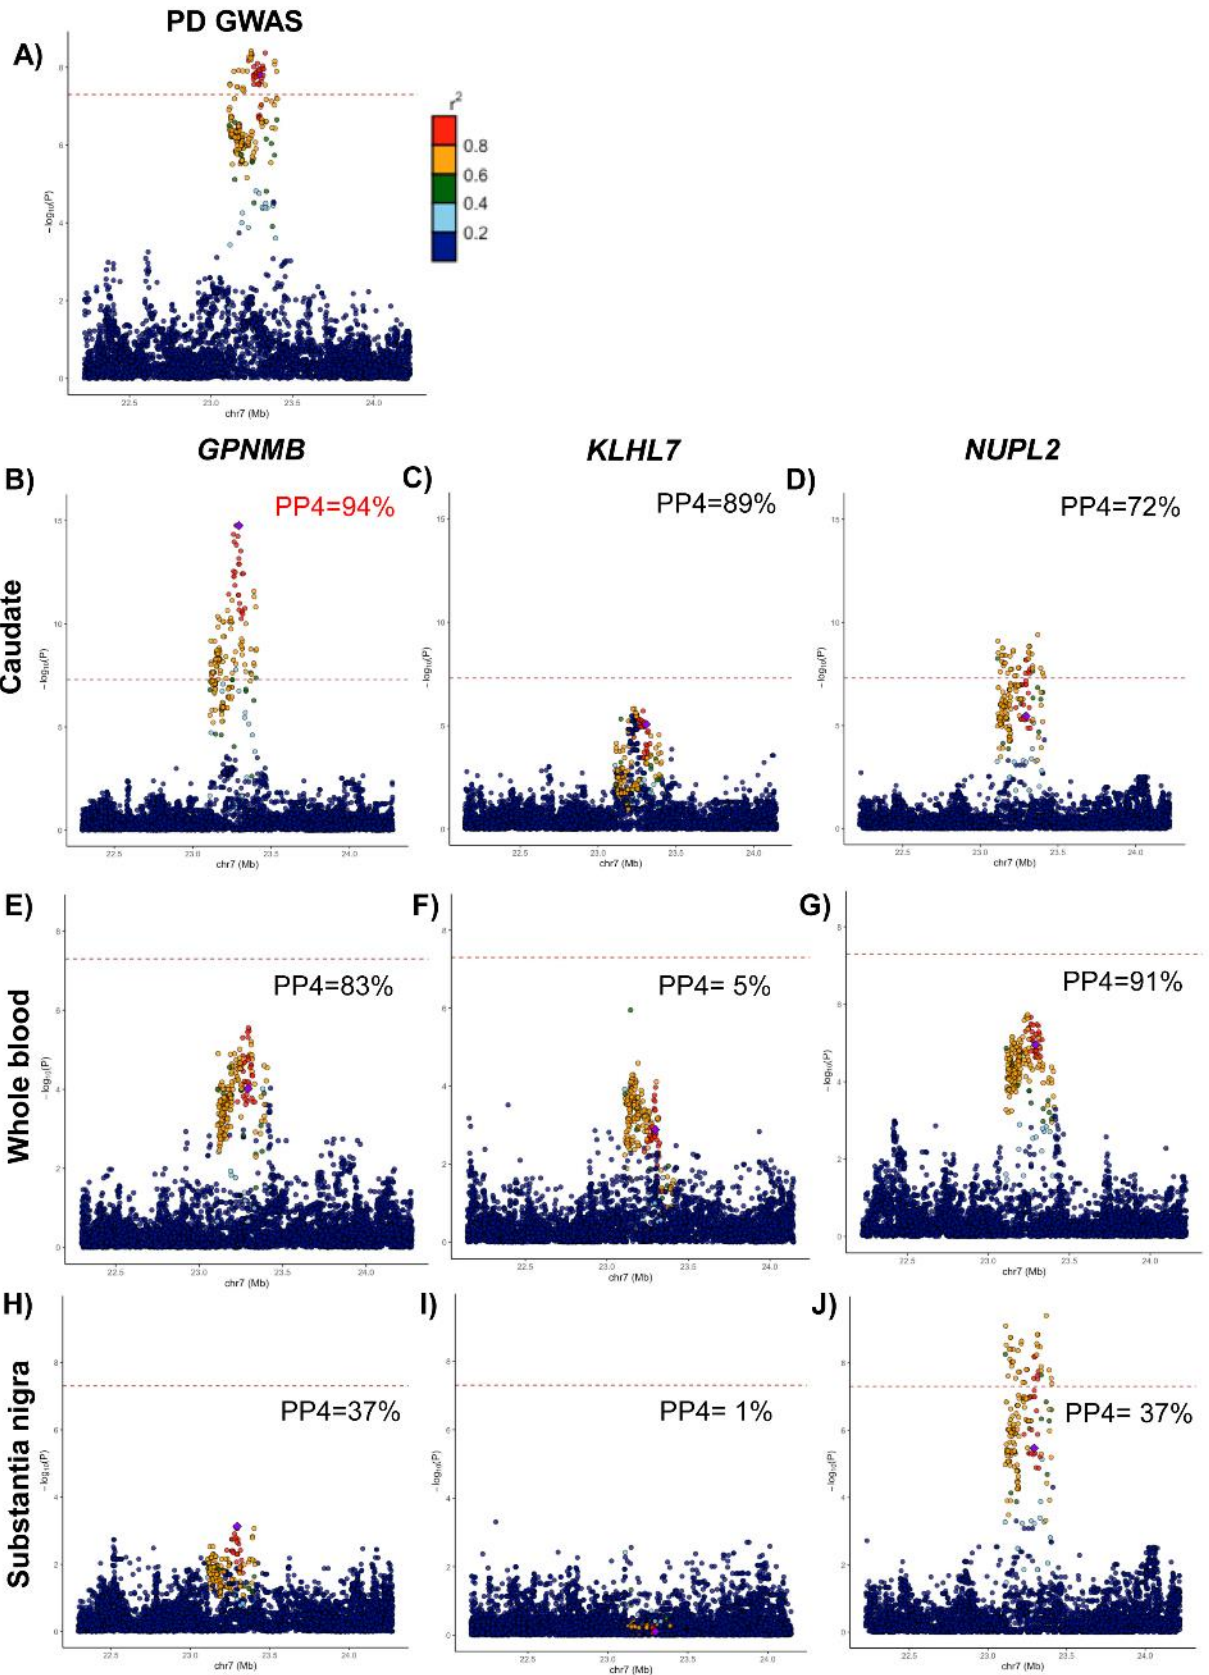

451 **Fig. S1. Colocalization analyses suggest *GPNMB* as the target gene of chromosome 7 PD**  
452 **GWAS risk locus. (A)** Locus plot of PD-risk GWAS p-values (2) for chromosome 7 locus.  
453 **(B-J)** Locus plots showing p-values for GTEx (10) tissue-specific eQTL's in the caudate nucleus  
454 **(B-D)**, whole blood **(E-G)**, and substantia nigra **(H-J)** for potential target genes *GPNMB*  
455 **(B,E,H)**, *KLHL7* **(C,F,I)**, and *NUPL2* **(D,G,J)**. Posterior probability of colocalization (PP4) for  
456 each tissue-specific eQTL and PD-risk GWAS is specified on the upper right of each panel.  
457 Significant colocalization is defined as  $PP4 > 75\%$ . Red font indicates significant colocalization  
458 of GWAS and genome-wide significant ( $p < 5E-8$ ) eQTL signal. The purple diamond  
459 corresponds to the top GWAS SNP, rs199347. All other SNPs are colored according to their  $r^2$   
460 measure of linkage disequilibrium with rs199347. Dashed line indicates genomewide  
461 significance threshold of  $5E-8$ .  
462

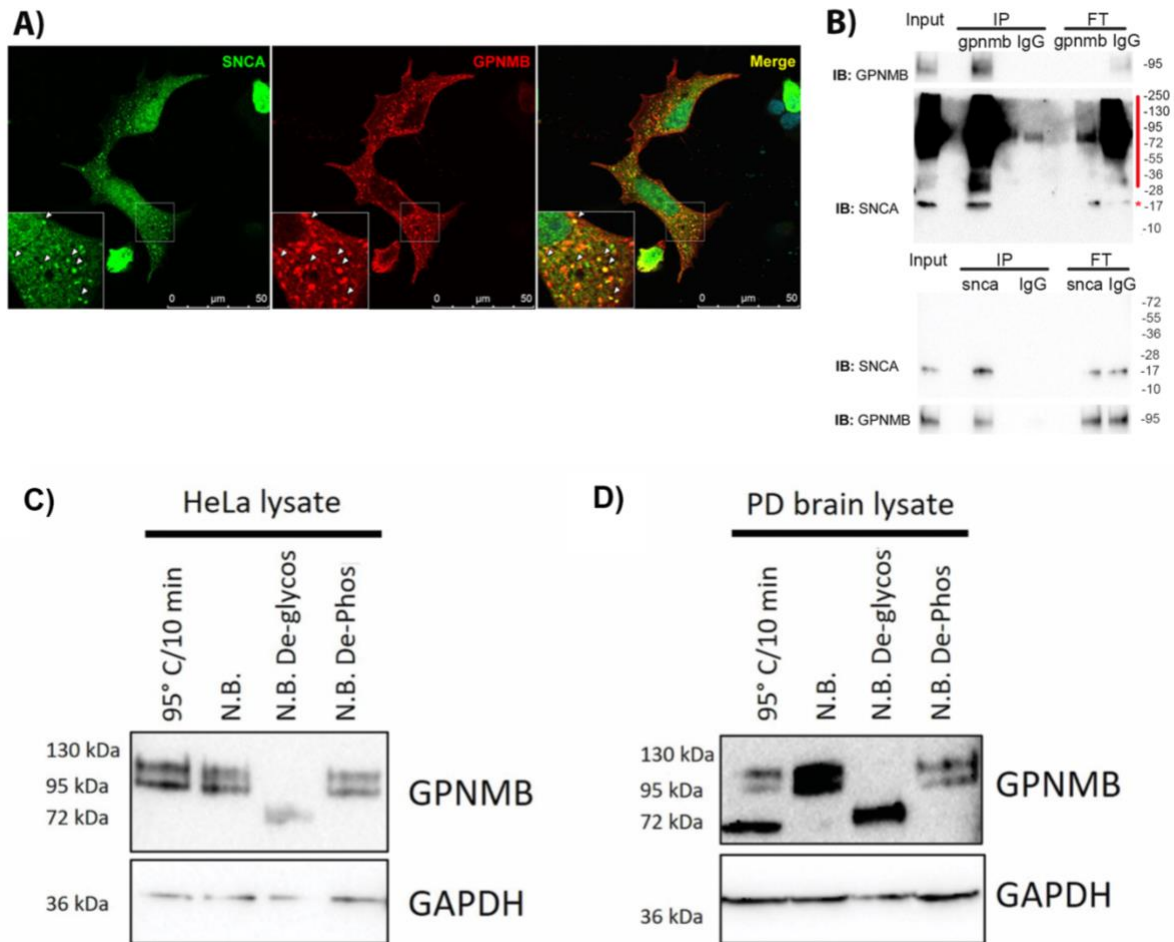

463

464 **Fig. S2: Characterization of GPNMB in HEK293 cells and human brain lysate.**

465 HEK293 cells over-expressing GPNMB and alpha-synuclein (SNCA) show (A) co-localization  
 466 of GPNMB (red, D9 antibody) and SNCA (green, MJFR1 antibody) on immunofluorescence  
 467 confocal microscopy, (B) co-IP of SNCA when GPNMB is IP'd (top, SNCA detected with  
 468 MJFR1 antibody), and co-IP of GPNMB when SNCA is IP'd (bottom, GPNMB detected with  
 469 E1Y7J antibody). For all IP's, a negative control IgG IP is shown, along with input (10% of IP),  
 470 and flow-through (FT) lanes. When GPNMB is IP'd, bands corresponding to higher-molecular  
 471 weight multimers or aggregates of SNCA are observed occasionally (red bar) in HEK293 cells,



472 whereas no other bands appear on the GPNMB immunoblots. In both HeLa cells **(C)** and human  
473 brain lysates **(D)**, GPNMB appears as 1-2 bands >95kD, collapsing to a single 72kD band with  
474 deglycosylation. For **(C)** and **(D)**, the order of the bands is as follows: sample heated to 95°C for  
475 10 minutes, sample kept on ice (not boiled or N.B.), sample deglycosylated with PNGase F (N.B.  
476 De-glycos), and sample dephosphorylated with Lambda protein phosphatase (N.B. De-Phos).

477

478

479

480

**A) CRISPR-Cas9 KO Workflow:**

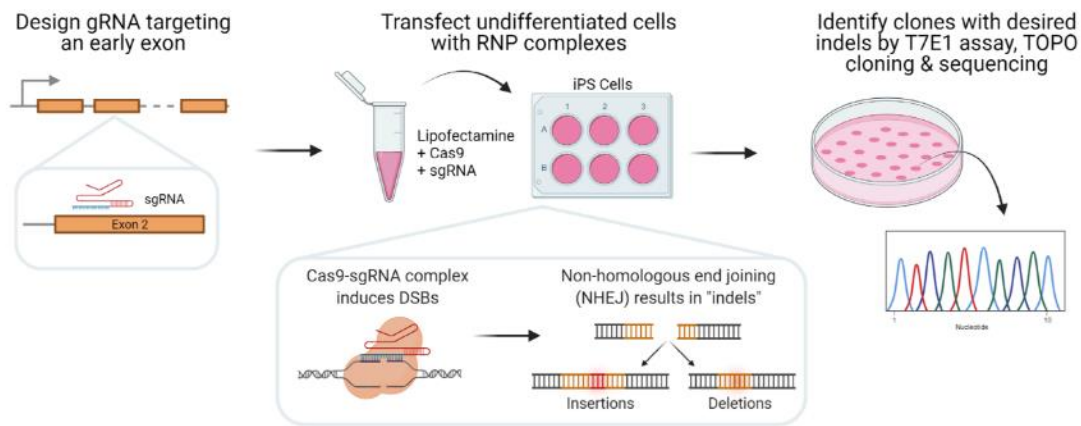

**B)**

| Cell Line | Indel | Result                                          |
|-----------|-------|-------------------------------------------------|
| 1C (WT)   | 0     | NA                                              |
| 6D (KO1)  | -1    | Early stop, truncated at AA 36                  |
|           | -7    | Early stop, truncated at AA 41                  |
| 6H (KO2)  | +1    | Early stop, truncated at AA 49                  |
|           | -1    | Early stop, truncated at AA 36                  |
| 2A (Het)  | 0     | NA                                              |
|           | -18   | Deletion of 6 AA's (PSAYMR) at position 34 - 39 |

**C)**

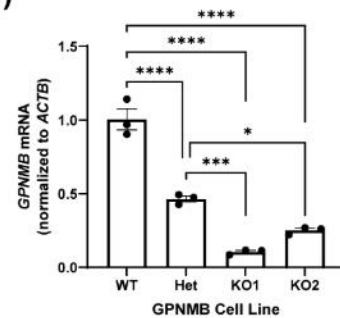

482

483

**Fig. S3. CRISPR-Cas9 generation of GPNMB WT, Het, and KO iPSC lines.**

484

**A)** Schematic outlining experimental design. sgRNA targeting *GPNMB* exon 2 was designed

485

using Synthego software. Cells were transfected with Cas9 RNP using lipofectamine STEM

486

reagent. Desired clones were identified by T7E1 assay, TOPO cloning, and sequencing. Created

487

with [BioRender.com](https://www.biorender.com). **B)** Indel length and predicted protein translation products based on

488

sequencing of individual strands for each cell line. **C)** qPCR validation of *GPNMB* knock-out in

489

iPSC. n = 3 wells from independent differentiations per line. Statistical test used was one-way

490

ANOVA, followed by post-hoc Tukey tests. \* p < 0.05, \*\*\* p < 0.001, \*\*\*\* p < 0.0001.

491

492

**A)**

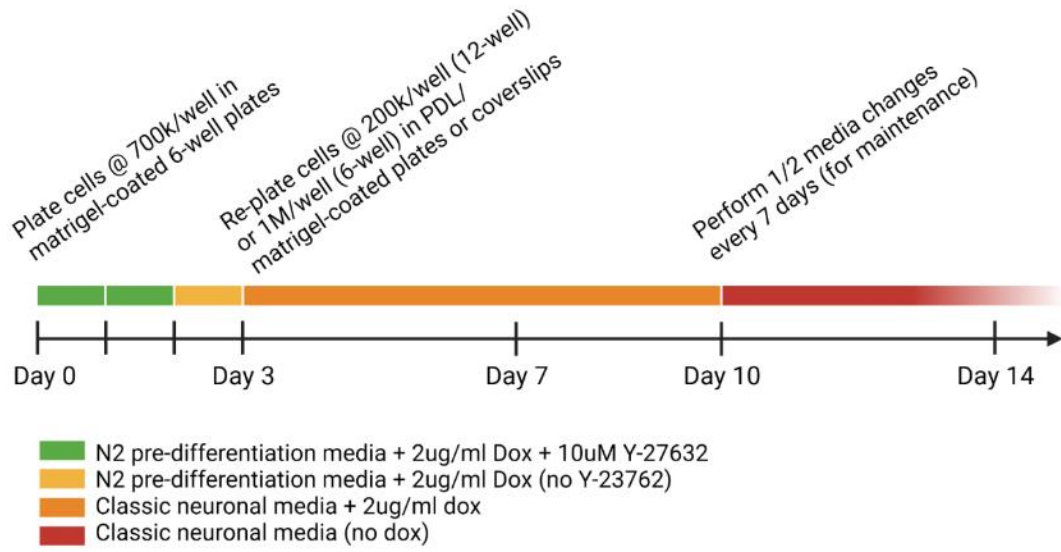

**B)**

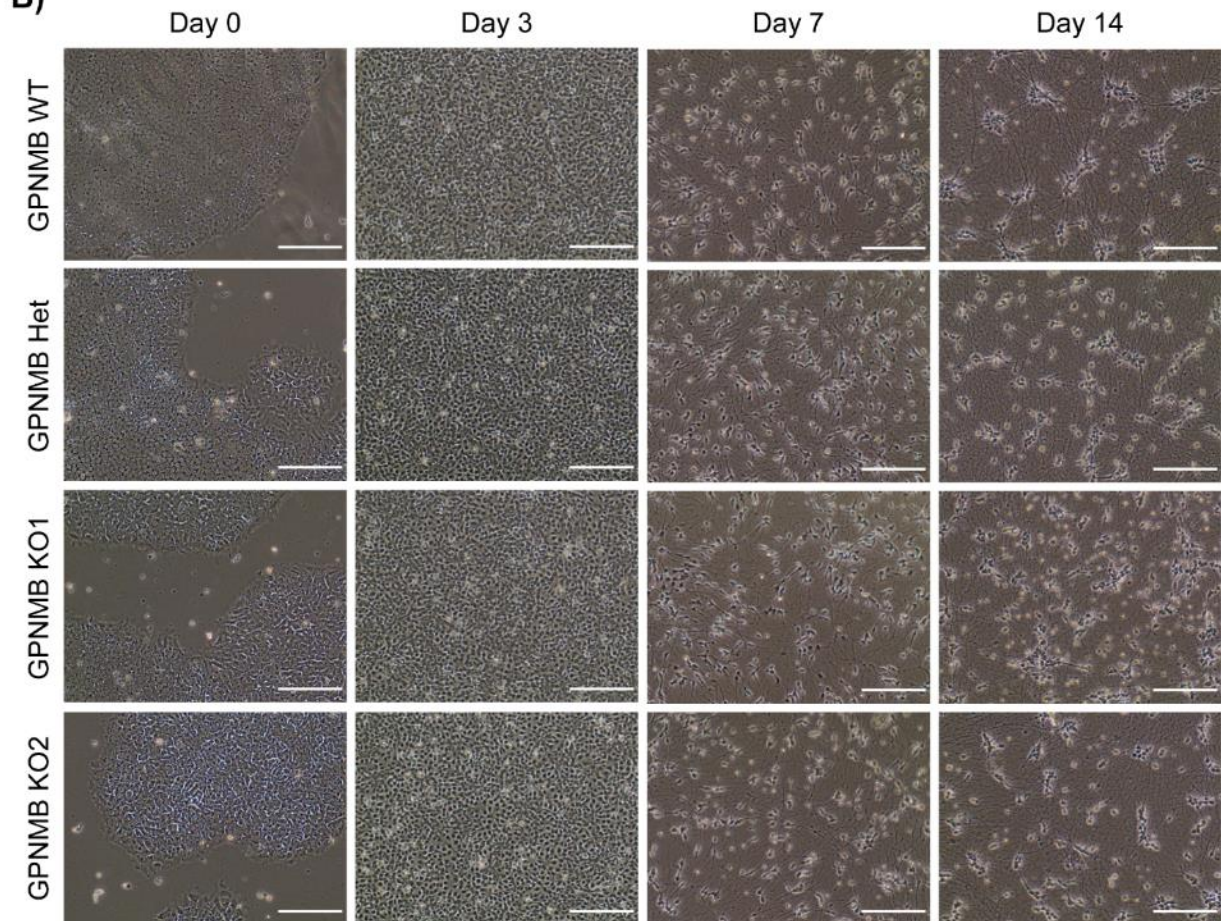

494 **Fig. S4. Differentiation of GPNMB-edited iPSC lines into neurons (iPSC-N).**

495 **A)** Schematic outlining differentiation protocol for iPSC-N. Created with [BioRender.com](https://www.biorender.com). **B)**

496 Brightfield images of GPNMB WT, Het, KO1, and KO2 lines on days 0, 3, 7, and 14 after

497 doxycycline induction. Scale bar = 200 $\mu$ m.

498

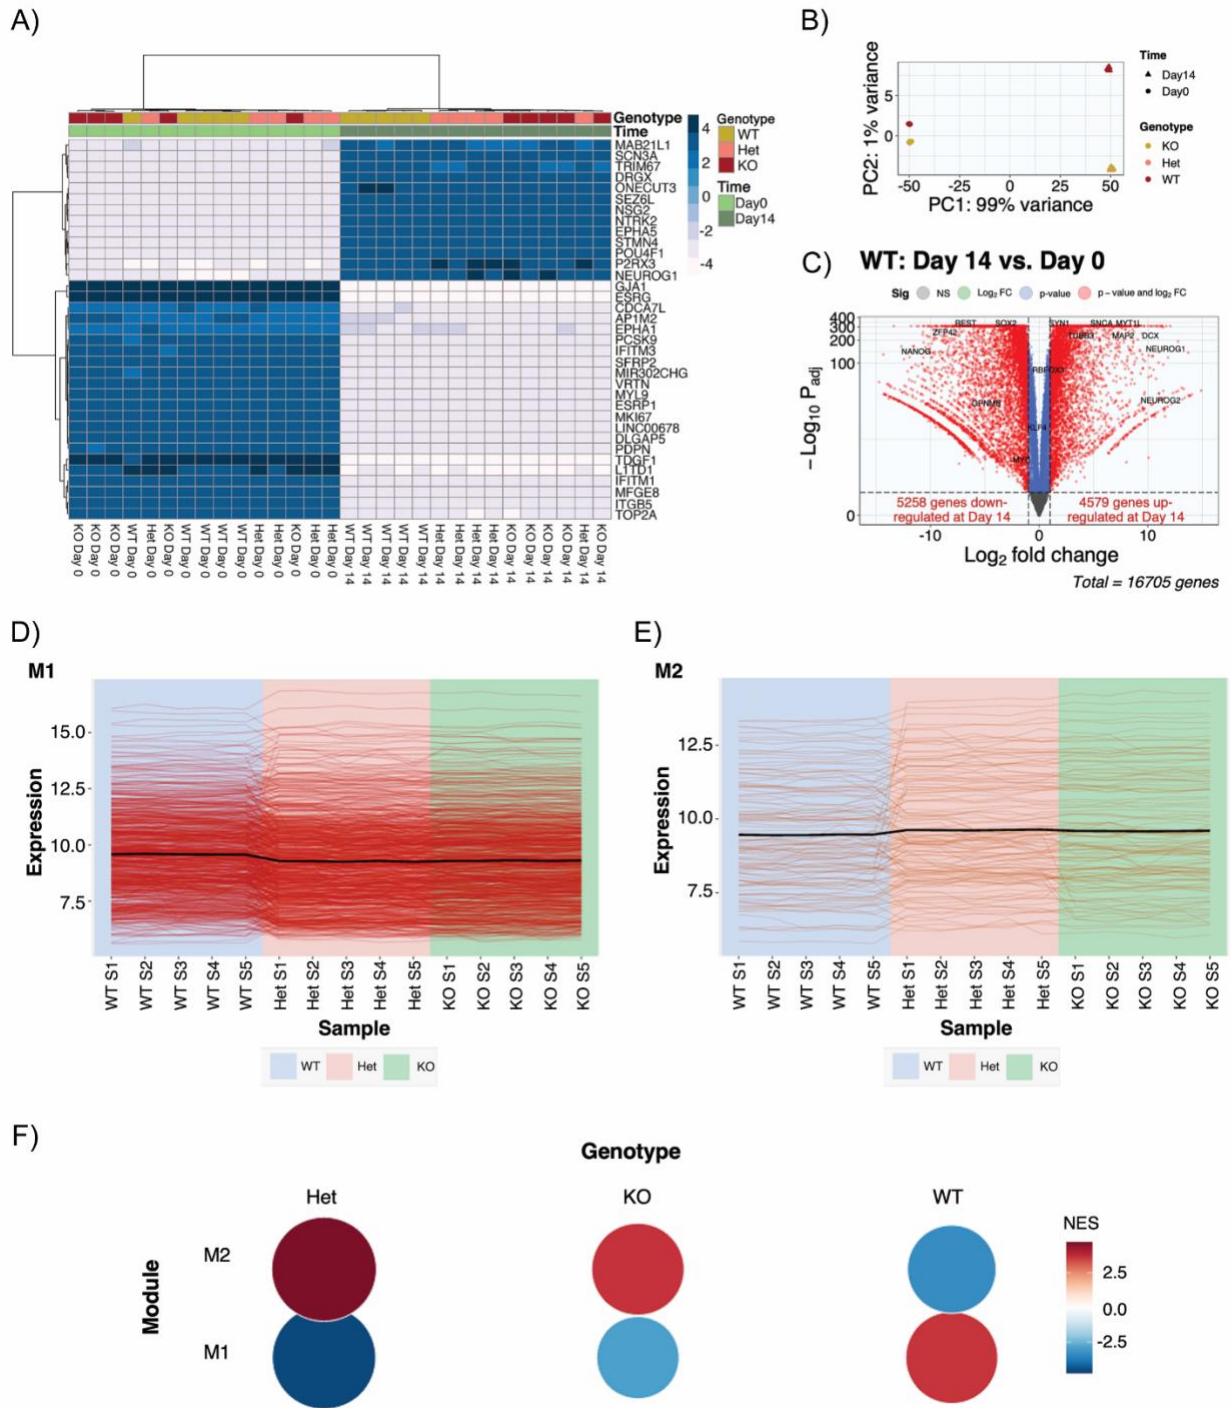

499

500 **Fig. S5. Additional RNAseq Analysis of Day 0 and 14 iPSC-N.**

501 (A) Heatmap showing clustering of days 0 and 14 iPSC-N using the top 35 most variable genes.

502 The first bar along the top row shows clustering of iPSC-N cells by GPNMB status within



503 timepoints, whereas the second bar shows stronger clustering by timepoint (day 0 or 14 after  
504 neuronal induction). Samples (columns) and genes (rows) were clustered by hierarchical  
505 clustering (hclust) using the complete linkage method and Euclidian distances. **(B)** Principal  
506 component analysis (PCA) using all expressed genes shows, as expected, highly differential gene  
507 expression in undifferentiated (day 0) vs. neuronally-differentiated (day 14) samples (separation  
508 along PC1). Additionally, while undifferentiated samples showed some separation by GPNMB  
509 KO status, this separation widened substantially with neuronal differentiation (day 14, separation  
510 along PC2). **(C)** Volcano plot showing genes with differing expression in day 14 (neuronal) cells  
511 compared to day 0 (undifferentiated) cells, independent of GPNMB status. The horizontal axis  
512 indicates the  $\log_2$  fold-change ( $\log_2FC$ ) in gene expression. The vertical axis indicates the  $-\log_{10}$   
513 of Benjamini-Hochberg adjusted p-value ( $P_{adj}$ ). The horizontal dotted line indicates the  
514 significance threshold ( $P_{adj} = 0.01$ ), with genes above this line showing significant differential  
515 expression ( $FDR < 0.01$ ). The genes are red colored if they passed both thresholds ( $P_{adj} < 0.01$   
516 and  $|\log_2FC| > 1$ ), blue if they met only the  $P_{adj}$  criteria, green if they passed only the  $\log_2FC$   
517 criteria, and dark gray if they met neither criterion. **(D-E)** Module gene expression profiles for  
518 module M1 **(D)** and M2 **(E)** show the individual gene expression profiles within modules. The  
519 colors represent GPNMB status (WT, Het, or KO). The median expression of all genes within  
520 the module is indicated by the black line. **(F)** Module activity for each GPNMB subtype (WT,  
521 Het, or KO). The enrichment score (ES) of a module is normalized (NES) by the number of  
522 genes in the module. Red color indicates higher activity and blue represents lower activity. The  
523 circle size and color intensity are proportional to the NES values.

524

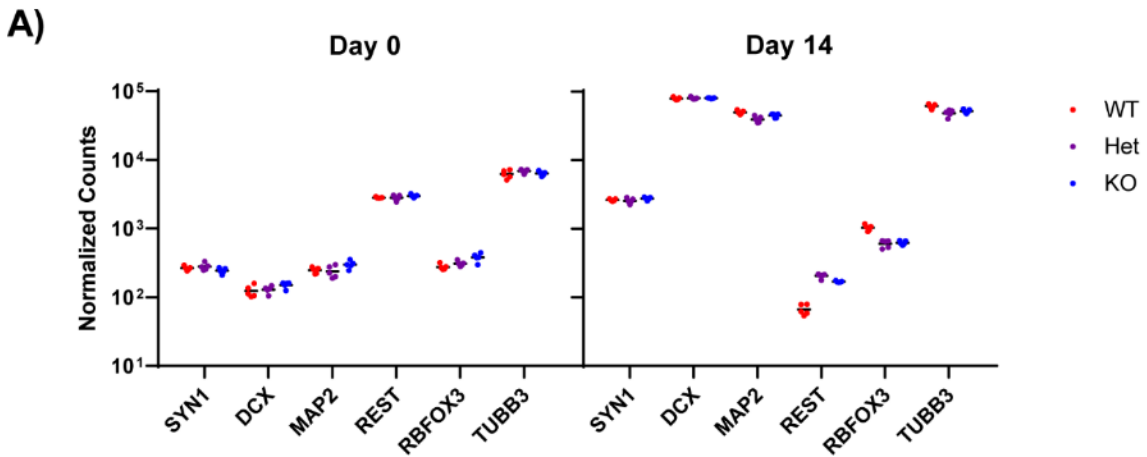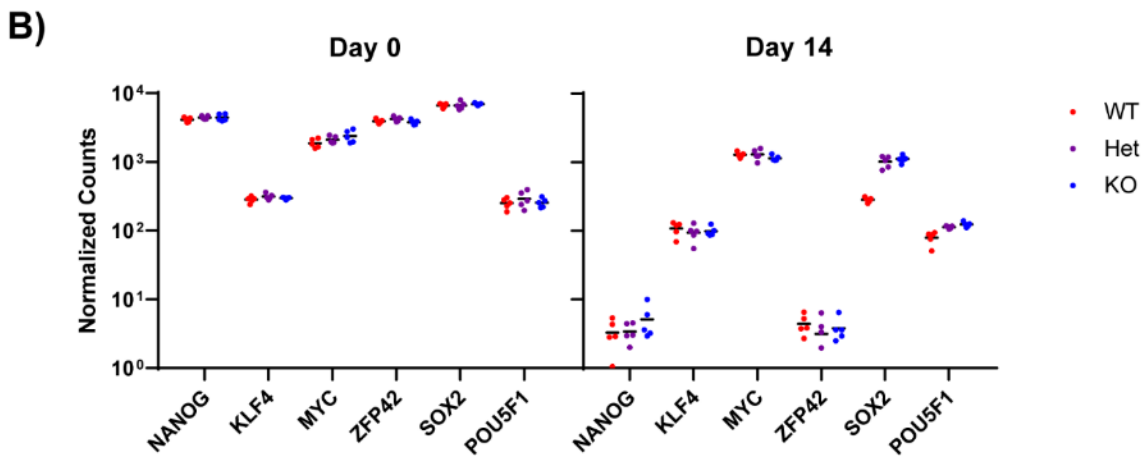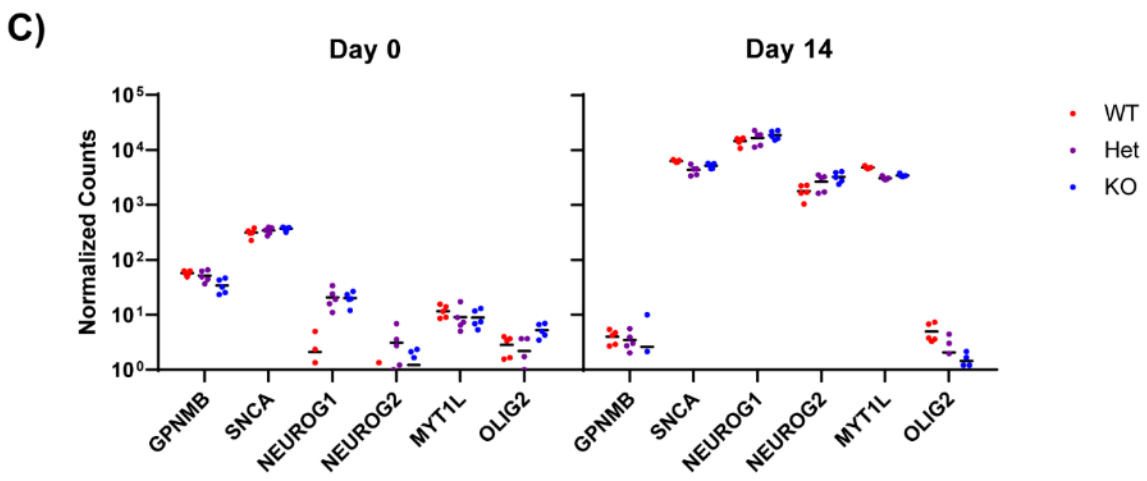

525

526

527 **Fig. S6. RNAseq expression of key genes over time.**

528 (A-C) Normalized expression of neuronal differentiation markers (A), pluripotency markers (B),  
529 and other genes of interest (C) in GPNMB WT, Het, and KO iPSC-N at days 0 and 14 after dox  
530 induction. n = 5 samples from 3 independent differentiations per cell line per timepoint.

531

532



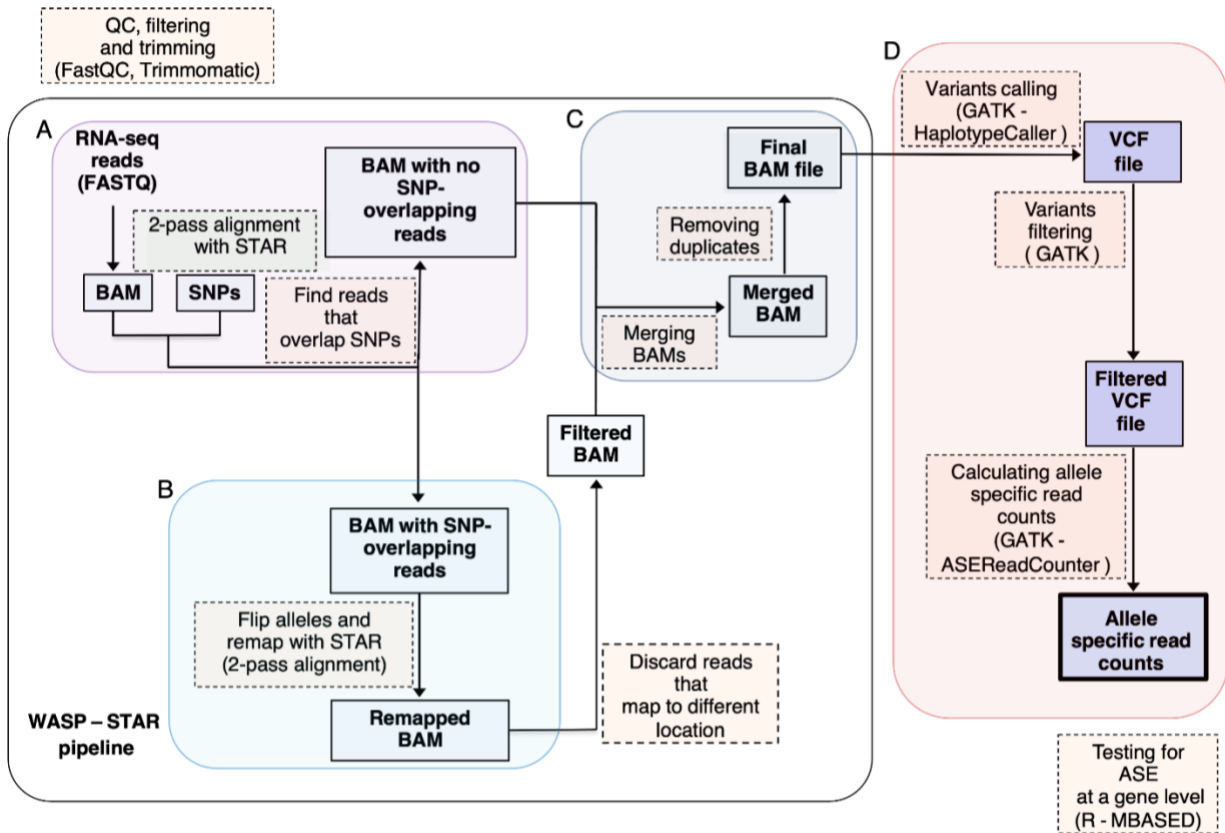

534 **Fig. S7. Allele specific expression (ASE) workflow.**

535 (A) RNA-seq data were first QC filtered and then mapped to the human reference  
 536 (GRCh37) with STAR aligner using a 2-step approach. To remove allelic bias the aligned reads  
 537 were split into reads that did and did not overlap with SNVs and into separate BAM files. (B) .  
 538 The SNV genotypes were flipped in all reads that overlapped a SNV (in each read the genotype  
 539 was swapped with that of the other allele) and re-mapped to reference genome again. Reads that  
 540 did not re-map to the original location were discarded. (C) Filtered BAM files were then  
 541 merged with BAM files that didn't overlap with SNVs. Duplicate reads were removed  
 542 using *rmdup\_pe.py* script incorporated into the WASP pipeline. (D) SNV were called and  
 543 filtered using GATK tools. The allele specific counts were obtained by *ASEReadCounter* GATK  
 544 tools. MBASED algorithm was used to test for ASE at the gene level.

545 **Table S1.**  
 546 Summary of demographics and brain regions used for human postmortem brain experiments.  
 547 ASE=allele-specific expression, WB=Western blot, IHC=immunohistochemistry. The  
 548 representative cases depicted in Figure 1's IHC are Patient ID 119534 and Patient ID 118273,  
 549 but all 6 cases were stained and evaluated.  
 550

| Assay | Patient ID | Clinical Diagnosis | Age at Death (yrs) | Sex | Disease Duration (yrs) | Caudate | Cingulate | Cerebellum | Temporal Cortex |
|-------|------------|--------------------|--------------------|-----|------------------------|---------|-----------|------------|-----------------|
| ASE   | 100671     | PD with Dementia   | 88                 | F   | 17                     | x       | x         | x          |                 |
|       | 104173     | PD with Dementia   | 73                 | M   | 14                     | x       | x         | x          |                 |
|       | 105484     | PD with Dementia   | 67                 | M   | 6                      | x       | x         | x          |                 |
|       | 114691     | PD with Dementia   | 72                 | M   | 8                      | x       | x         | x          |                 |
|       | 101060     | Normal             | 72                 | M   |                        | x       |           | x          |                 |
|       | 118624     | Normal             | 70                 | M   |                        | x       |           |            |                 |
|       |            |                    |                    |     |                        |         |           |            |                 |
| WB    | 118624     | Normal             | 70                 | M   |                        | x       |           |            |                 |
|       | 113756     | Depression         | 43                 | M   | 6                      | x       |           |            |                 |
|       | 112090     | Normal             | 83                 | F   |                        | x       |           |            |                 |
|       | 101060     | Normal             | 72                 | M   |                        | x       |           |            |                 |
|       | 116519     | Normal             | 67                 | F   |                        | x       |           |            |                 |
|       | 114653     | PD with Dementia   | 80                 | M   | 14                     | x       |           |            |                 |
|       | 104717     | PD with Dementia   | 87                 | M   | 28                     | x       |           |            |                 |
|       | 108649     | PD with Dementia   | 72                 | M   | 23                     | x       |           |            |                 |
|       | 116280     | PD with MCI        | 82                 | F   | 23                     | x       |           |            |                 |
|       | 109853     | PD with Dementia   | 77                 | M   | 16                     | x       |           |            |                 |
|       |            |                    |                    |     |                        |         |           |            |                 |
| IHC   | 121111     | Normal             | 68                 | M   |                        |         | x         |            | x               |
|       | 117925     | Normal             | 78                 | M   |                        |         | x         |            | x               |
|       | 119534     | Normal             | 72                 | F   |                        |         | x         |            | x               |
|       | 125654     | Parkinsonism       | 56                 | M   | 5                      |         | x         |            | x               |
|       | 118273     | PD with Dementia   | 83                 | M   | 10                     |         | x         |            | x               |

|  |        |     |    |   |   |  |   |  |   |
|--|--------|-----|----|---|---|--|---|--|---|
|  | 121672 | DLB | 74 | M | 6 |  | x |  | x |
|--|--------|-----|----|---|---|--|---|--|---|

551

552

553  
554  
555

**Table S4.**  
Cohort demographics for comparison of GPNMB plasma levels between PD and NC.

| Variable                            | Diagnosis                |                        | Statistics     |         |         |
|-------------------------------------|--------------------------|------------------------|----------------|---------|---------|
|                                     | PD                       | NC                     | Test           | P-value | Signif. |
| N                                   | 731                      | 59                     | NA             |         |         |
| Sex (N)                             | Female: 247<br>Male: 484 | Female: 35<br>Male: 24 | Fisher's Exact | 0.0002  | ***     |
| Age (Yrs)<br>Mean ± SD              | 67.64 ± 8.96             | 71.53 ± 7.84           | T-test         | 0.0005  | ***     |
| Disease Duration<br>(Yrs) Mean ± SD | 7.16 ± 5.94              | NA                     |                |         |         |

556  
557

n.s. =  $p \geq 0.05$ , \* =  $p < 0.05$ , \*\* =  $p < 0.01$ , \*\*\* =  $p < 0.001$ , \*\*\*\* =  $p < 0.0001$

558

559 **Table S5.**

560 Cohort demographics for GPNMB plasma pQTL analysis.

561

| Variable                                | Diagnosis                |                        | Statistics     |         |         |
|-----------------------------------------|--------------------------|------------------------|----------------|---------|---------|
|                                         | PD                       | NC                     | Test           | P-value | Signif. |
| N                                       | 724                      | 32                     |                |         |         |
| Sex (N)                                 | Female: 246<br>Male: 478 | Female: 21<br>Male: 11 | Fisher's Exact | 0.0005  | ***     |
| Age (Yrs)<br>Mean $\pm$ SD              | 67.69 $\pm$ 8.98         | 69.06 $\pm$ 6.65       | T-test         | 0.2694  | n.s.    |
| Disease Duration<br>(Yrs) Mean $\pm$ SD | 7.15 $\pm$ 5.93          | NA                     |                |         |         |

562

563 n.s. =  $p \geq 0.05$ , \* =  $p < 0.05$ , \*\* =  $p < 0.01$ , \*\*\* =  $p < 0.001$ , \*\*\*\* =  $p < 0.0001$

564

565 **Table S6.**

566 Cohort demographics for comparison of GPNMB CSF levels between PD and NC.

567

| Variable                            | Diagnosis              |                        | Statistics     |         |         |
|-------------------------------------|------------------------|------------------------|----------------|---------|---------|
|                                     | PD                     | NC                     | Test           | P-value | Signif. |
| N                                   | 72                     | 40                     |                |         |         |
| Sex (N)                             | Female: 37<br>Male: 35 | Female: 20<br>Male: 20 | Fisher's Exact | 1       | n.s.    |
| Age (Yrs)<br>Mean ± SD              | 66.46 ± 6.61           | 69.2 ± 6.70            | T-test         | 0.0456  | *       |
| Disease Duration<br>(Yrs) Mean ± SD | 6.38 ± 4.42            | NA                     |                |         |         |

568

569 n.s. =  $p \geq 0.05$ , \* =  $p < 0.05$ , \*\* =  $p < 0.01$ , \*\*\* =  $p < 0.001$ , \*\*\*\* =  $p < 0.0001$

570

571

572 **Table S7.**  
 573 Cohort demographics for GPNMB CSF pQTL analysis.  
 574

| Variable                            | Diagnosis              |                        | Statistics     |         |         |
|-------------------------------------|------------------------|------------------------|----------------|---------|---------|
|                                     | PD                     | NC                     | Test           | P-value | Signif. |
| N                                   | 70                     | 31                     |                |         |         |
| Sex (N)                             | Female: 36<br>Male: 34 | Female: 18<br>Male: 13 | Fisher's Exact | 0.666   | n.s.    |
| Age (Yrs)<br>Mean ± SD              | 66.44 ± 6.67           | 67.61 ± 6.18           | T-test         | 0.395   | n.s.    |
| Disease Duration<br>(Yrs) Mean ± SD | 7.22 ± 4.51            | NA                     |                |         |         |

575  
 576 n.s. =  $p \geq 0.05$ , \* =  $p < 0.05$ , \*\* =  $p < 0.01$ , \*\*\* =  $p < 0.001$ , \*\*\*\* =  $p < 0.0001$   
 577

578

579 **Table S8.**

580 Results for linear regression of plasma GPNMB ~ PD diagnosis + rs199347 genotype  
581 (codominant model) + age + sex.  
582

| Variable              | Estimate ( $\beta$ ) | Std. Error | t value  | P-value  | Signif. |
|-----------------------|----------------------|------------|----------|----------|---------|
| (Intercept)           | 2.735117             | 0.132445   | 20.65103 | 2.21E-75 | ****    |
| Sex (Male vs. Female) | 0.042786             | 0.028966   | 1.477142 | 0.140057 |         |
| Age (Yrs)             | 0.000796             | 0.00155    | 0.51368  | 0.607627 |         |
| Cohort (PD vs. NC)    | 0.141329             | 0.068611   | 2.059848 | 0.039757 | *       |
| rs199347 (AA vs. GG)  | 0.044773             | 0.038803   | 1.153834 | 0.248935 |         |
| rs199347 (GA vs. GG)  | 0.061689             | 0.037284   | 1.654552 | 0.098433 | .       |

583

584 . =  $p < 0.1$ , \* =  $p < 0.05$ , \*\* =  $p < 0.01$ , \*\*\* =  $p < 0.001$ , \*\*\*\* =  $p < 0.0001$   
585



586 **Table S9.**

587 Results for linear regression of CSF GPNMB ~ PD diagnosis + rs199347 genotype (codominant  
 588 model) + age + sex.

589

| Variable              | Estimate ( $\beta$ ) | Std. Error | t value  | P-value  | Signif. |
|-----------------------|----------------------|------------|----------|----------|---------|
| (Intercept)           | 1.82835              | 0.168931   | 10.82303 | 2.92E-18 | ****    |
| Sex (Male vs. Female) | 0.04961              | 0.029236   | 1.696886 | 0.092992 | .       |
| Age (Yrs)             | 0.010435             | 0.002301   | 4.534395 | 1.68E-05 | ****    |
| Cohort (PD vs. NC)    | 0.06314              | 0.031755   | 1.988362 | 0.049649 | *       |
| rs199347 (AA vs. GG)  | 0.199285             | 0.043897   | 4.539812 | 1.65E-05 | ****    |
| rs199347 (GA vs. GG)  | 0.123633             | 0.040998   | 3.015597 | 0.00329  | **      |

590

591 . =  $p < 0.1$ , \* =  $p < 0.05$ , \*\* =  $p < 0.01$ , \*\*\* =  $p < 0.001$ , \*\*\*\* =  $p < 0.0001$

592

593 **Table S10.**

594 Results for linear regression of plasma GPNMB ~ UPDRS-PIII score + age + sex in the  
 595 Discovery cohort.

596

| Variable              | Estimate ( $\beta$ ) | Std. Error | t value  | P-value  | Signif. |
|-----------------------|----------------------|------------|----------|----------|---------|
| (Intercept)           | 2.611333             | 0.310946   | 8.398015 | 5.32E-13 | ****    |
| UPDRS-PIII            | 0.007614             | 0.00268    | 2.841321 | 0.005532 | **      |
| Age (Yrs)             | 0.001364             | 0.004803   | 0.283907 | 0.777119 |         |
| Sex (Male vs. Female) | 0.075098             | 0.078812   | 0.952885 | 0.343145 |         |

597

598 . =  $p < 0.1$ , \* =  $p < 0.05$ , \*\* =  $p < 0.01$ , \*\*\* =  $p < 0.001$ , \*\*\*\* =  $p < 0.0001$

599

600

601 **Table S11.**  
 602 Results for linear regression of plasma GPNMB ~ UPDRS-PIII score + age + sex in the  
 603 Replication cohort.  
 604

| Variable              | Estimate ( $\beta$ ) | Std. Error | t value  | P-value  | Signif. |
|-----------------------|----------------------|------------|----------|----------|---------|
| (Intercept)           | 3.953842             | 0.090524   | 43.67715 | 7.65E-63 | ****    |
| UPDRS-PIII            | 0.001392             | 0.000774   | 1.797537 | 0.075567 | .       |
| Age (Yrs)             | -0.00042             | 0.001328   | -0.31824 | 0.751034 |         |
| Sex (Male vs. Female) | -0.01343             | 0.018397   | -0.73021 | 0.46714  |         |

605  
 606 . =  $p < 0.1$ , \* =  $p < 0.05$ , \*\* =  $p < 0.01$ , \*\*\* =  $p < 0.001$ , \*\*\*\* =  $p < 0.0001$   
 607

608 **Table S2.**  
609 Module 1 genes in top 10 categories from overrepresentation analysis.

610

611 **Table S3.**  
612 Module 2 genes in top 3 categories from overrepresentation analysis.

613

614

615 **Table S12.**  
616 Summary of Illumina NovaSeq RNAseq run.

617

618

619 **Data S1.**  
620 Cell profiler pipeline used for image processing.
